# Supplementary material for: Microstructure of Coal Gangue and Precipitation of Heavy Metal Elements
Source: Hindawi journal article supplement (doi:10.1155/2017/3128549), 2017-01-01
Supplement: f1 [file 3128549.f1.pdf]

Groundwater quality classification index (China)

| Items                        | Categories              | I              | II            | III           | IV           | V         |
|------------------------------|-------------------------|----------------|---------------|---------------|--------------|-----------|
| Toxic heavy metals           | Hg(mg/L)                | $\leq 0.00005$ | $\leq 0.0005$ | $\leq 0.001$  | $\leq 0.001$ | $> 0.001$ |
|                              | Pb(mg/L)                | $\leq 0.005$   | $\leq 0.01$   | $\leq 0.05$   | $\leq 0.1$   | $> 0.1$   |
|                              | Cd(mg/L)                | $\leq 0.0001$  | $\leq 0.001$  | $\leq 0.01$   | $\leq 0.01$  | $> 0.01$  |
|                              | Cr <sup>6+</sup> (mg/L) | $\leq 0.005$   | $\leq 0.01$   | $\leq 0.05$   | $\leq 0.1$   | $> 0.1$   |
|                              | As(mg/L)                | $\leq 0.005$   | $\leq 0.01$   | $\leq 0.05$   | $\leq 0.05$  | $> 0.05$  |
| Excessive heavy toxic metals | Cu(mg/L)                | $\leq 0.01$    | $\leq 0.05$   | $\leq 1.0$    | $\leq 1.5$   | $> 1.5$   |
|                              | Zn(mg/L)                | $\leq 0.05$    | $\leq 0.5$    | $\leq 1.0$    | $\leq 5.0$   | $> 5.0$   |
|                              | Mn(mg/L)                | $\leq 0.005$   | $\leq 0.05$   | $\leq 0.1$    | $\leq 1.0$   | $> 1.0$   |
|                              | Fe(mg/L)                | $\leq 0.1$     | $\leq 0.2$    | $\leq 0.3$    | $\leq 1.5$   | $> 1.5$   |
| Hypertoxic metal             | Se(mg/L)                | $\leq 0.001$   | $\leq 0.001$  | $\leq 0.01$   | $\leq 0.1$   | $> 0.1$   |
|                              | Be(mg/L)                | $\leq 0.00002$ | $\leq 0.0001$ | $\leq 0.0002$ | $\leq 0.001$ | $> 0.001$ |
